# Supplementary material for: Tunable Carrier Transfer of Polymeric Carbon Nitride with Charge-Conducting CoV2O6∙2H2O for Photocatalytic O2 Evolution
Source: MDPI journal article supplement (doi:10.3390/nano12111931), 2022-06-05
Supplement: s1 [file s1]

# Tunable Carrier Transfer of Polymeric Carbon Nitride with Charge-Conducting $\text{CoV}_2\text{O}_6 \cdot 2\text{H}_2\text{O}$ for Photocatalytic $\text{O}_2$ Evolution

Shaohong Zang <sup>1</sup>, Xiaorong Cai <sup>1</sup>, Mengshan Chen <sup>1</sup>, Dehong Teng <sup>1</sup>, Fei Jing <sup>1</sup>, Zhe Leng <sup>1,\*</sup>, Yingtang Zhou <sup>1</sup> and Feng Lin <sup>2,\*</sup>

- <sup>1</sup> Institute of Innovation & Application, National Engineering Research Center For Marine Aquaculture, Zhejiang Ocean University, Zhoushan 316022, China; shzang@zjou.edu.cn (S.Z.); caixiaorong@zjou.edu.cn (X.C.); chenmengshan@zjou.edu.cn (M.C.); z20095136223@zjou.edu.cn (D.T.); jingfei@zjou.edu.cn (F.J.); zhouyingtang@zjou.edu.cn (Y.Z.)  
<sup>2</sup> College of Chemical and Materials Engineering, Quzhou University, Quzhou 324000, China  
 \* Correspondence: lengzhe@zjou.edu.cn (Z.L.); 39083@qzc.edu.cn (F.L.); Tel.: +86-0580-2262589 (Z.L.)

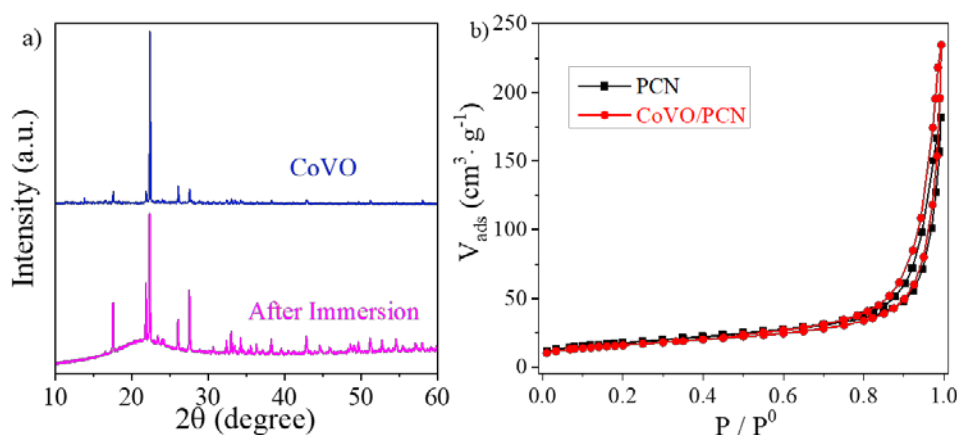

**Figure S1.** (a) XRD pattern of CoVO before and after immersion, (b) BET specific surface areas of PCN and 3 wt% CoVO/PCN samples.

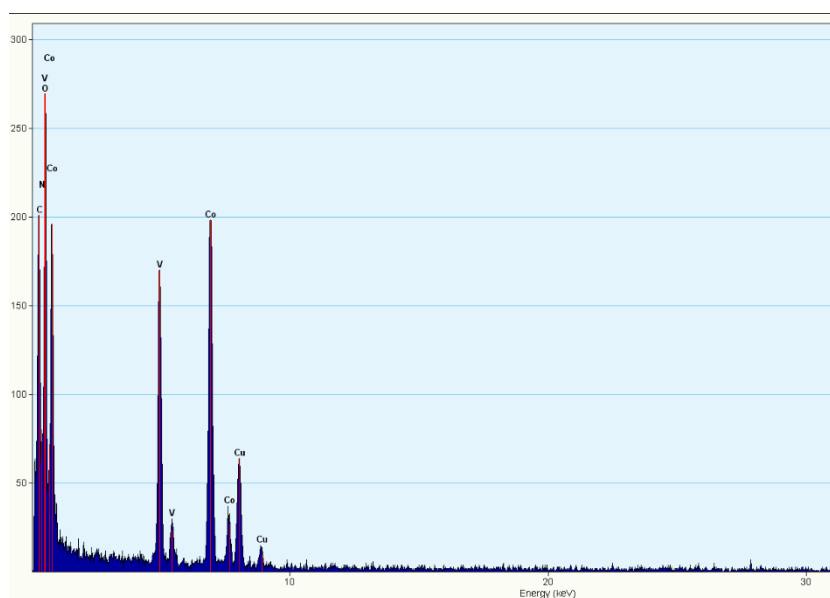

**Figure S2.** EDX analysis of 3 wt% CoVO/PCN sample.

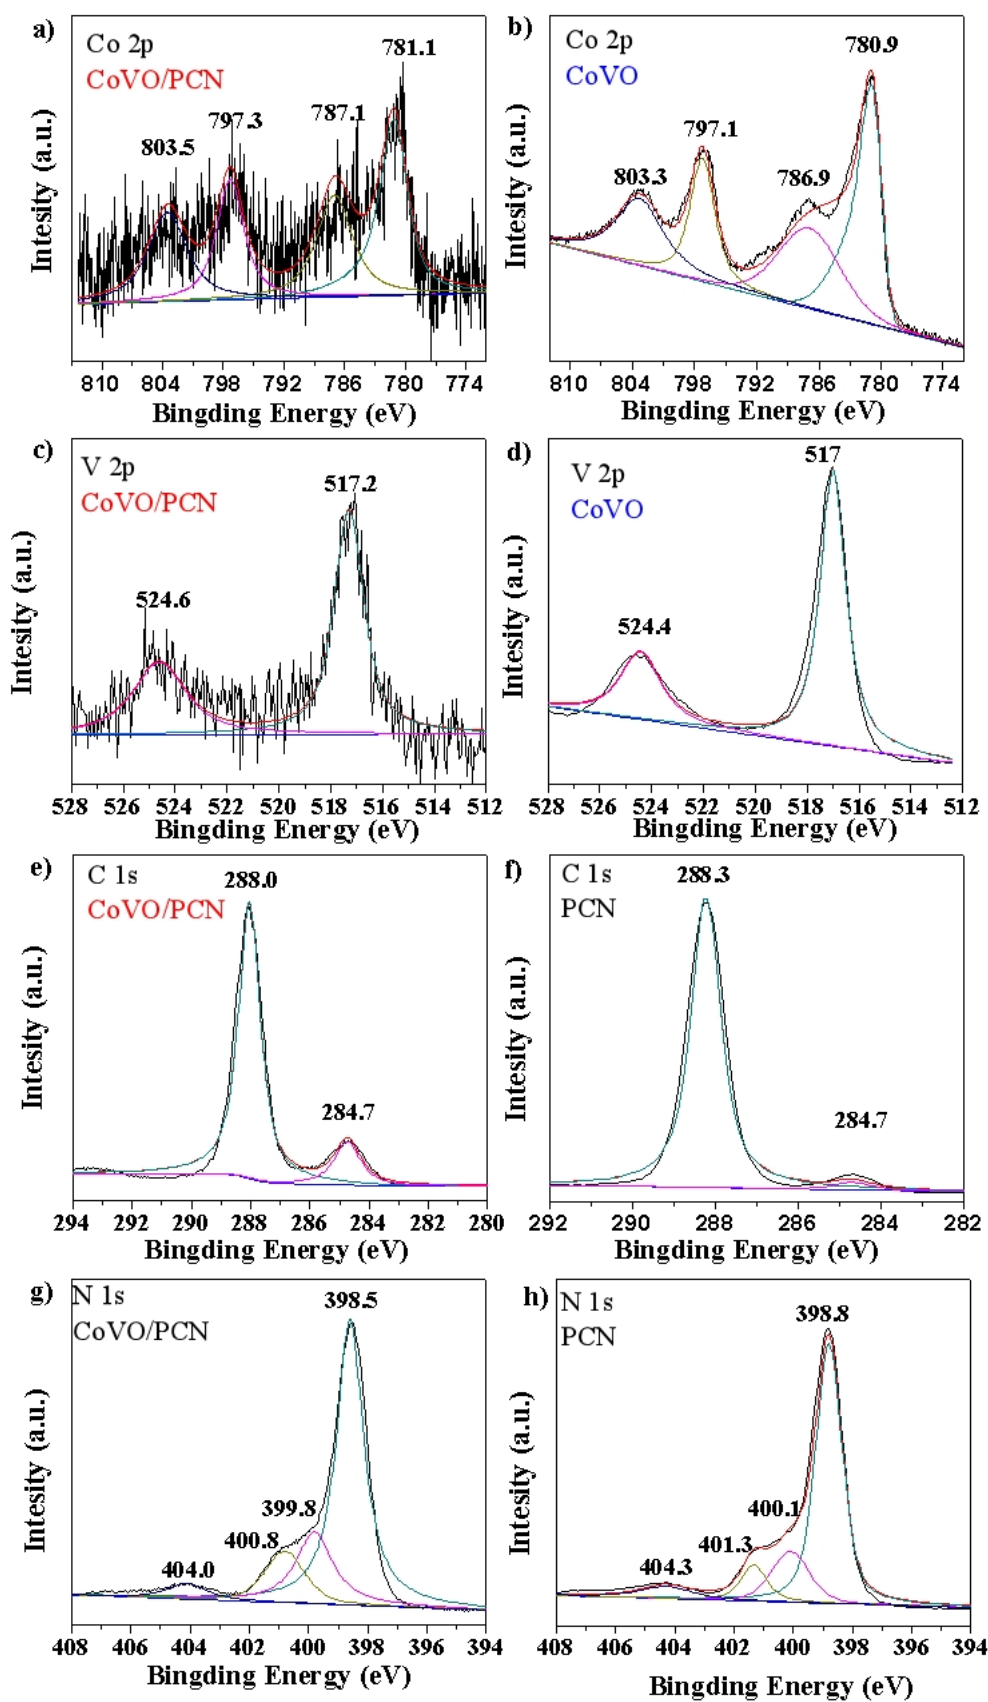

Figure S3. High-resolution XPS spectra of pure CoVO, PCN and the 3 wt% CoVO/PCN samples.

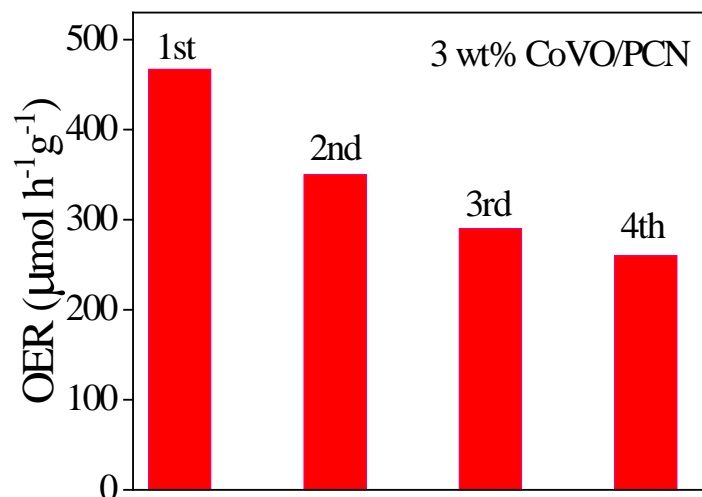

**Figure S4.** Recycling OER ability of 3 wt% CoVO/PCN.

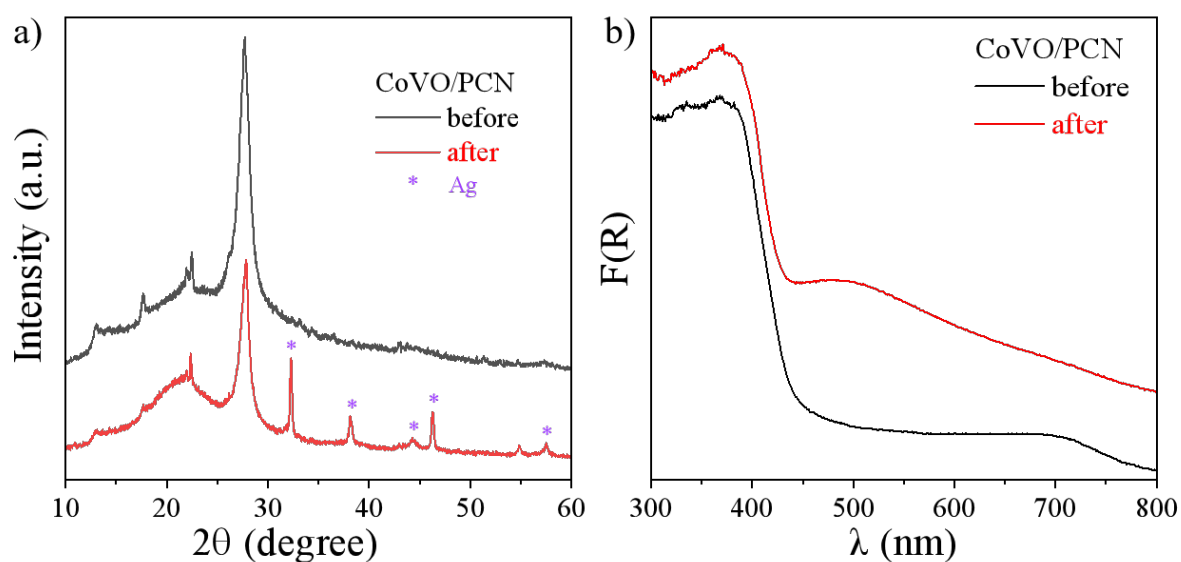

**Figure S5.** (a) XRD spectra and (b) DRS spectra of the recycled CoVO/PCN sample.

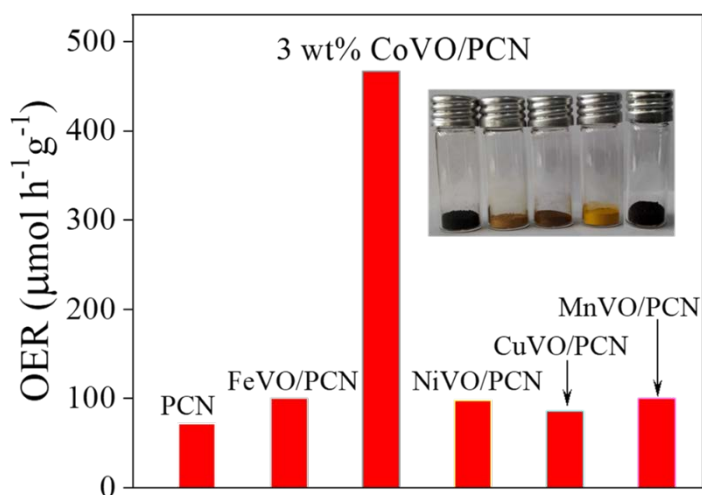

**Figure S6.** Photocatalytic  $\text{O}_2$  evolution curves of 3 wt% TMVO/PCN samples (TM: Fe, Co, Ni, Cu, Mn).

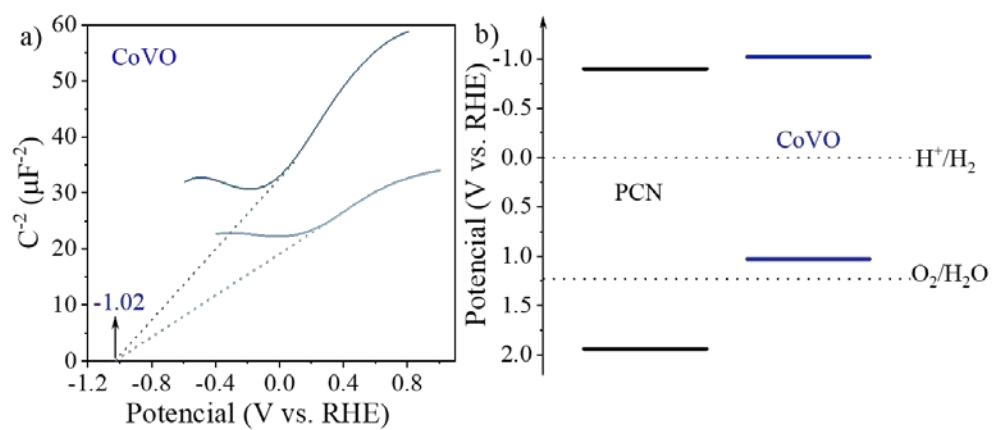

**Figure S7.** (a) Mott-Schottky plots of CoVO; (b) electronic band structure of the PCN and CoVO.
